# Supplementary material for: Ovarian Cancer and Glutamine Metabolism
Source: MDPI journal article supplement (doi:10.3390/ijms24055041), 2023-03-06
Supplement: s1 [file s1]

## Supplementary Materials

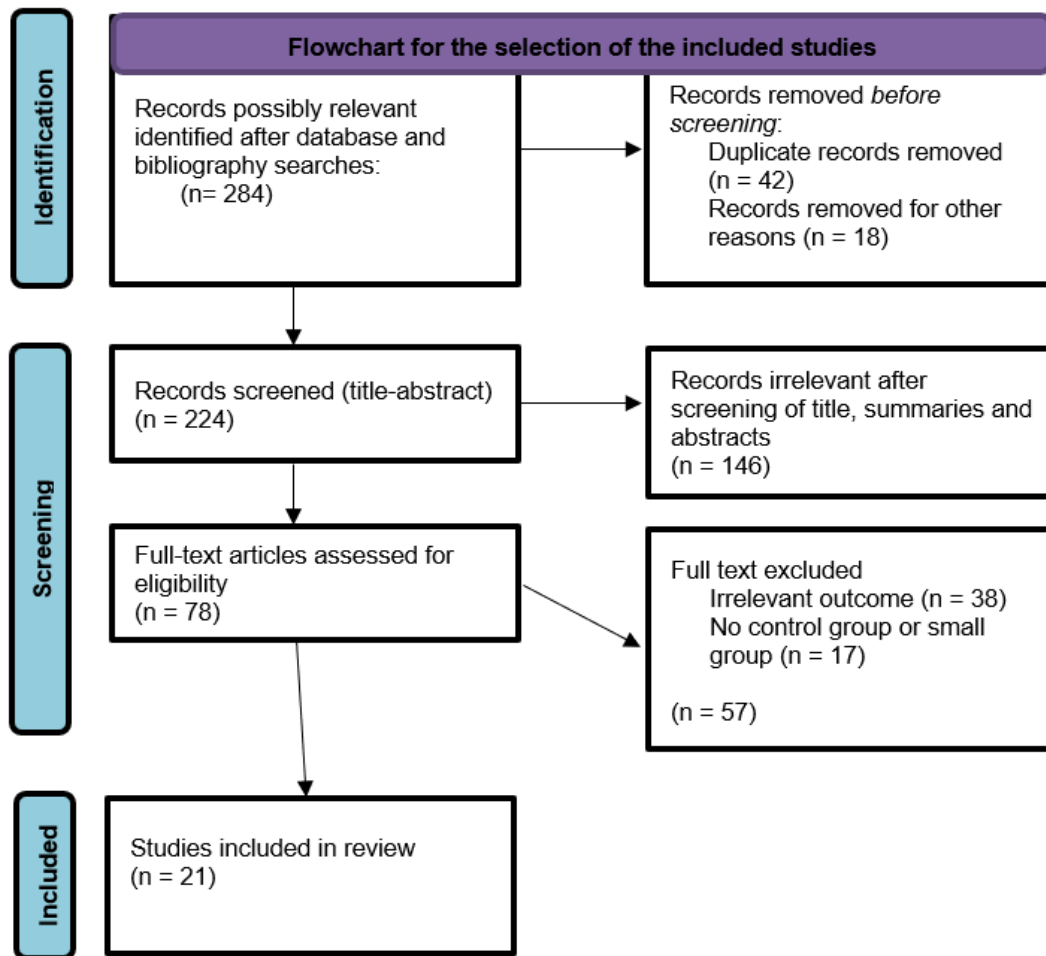

**Figure S1.** Flowchart of the selection of the included studies.

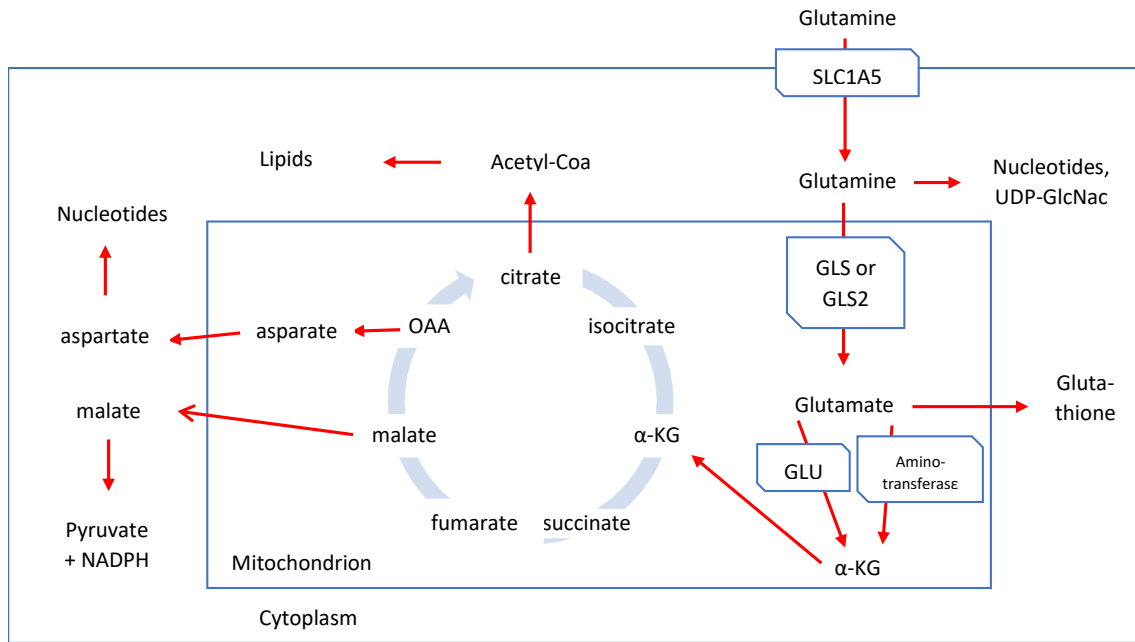

**Figure S2.** Main metabolic pathways of glutamine. (SLC1A5, solute carrier family 1 member 5; GLS, glutaminase, GLUD, glutamate dehydrogenase; α-KG, α-ketoglutarate; OAA, oxaloacetate; NADPH, reduced nicotinamide adenine dinucleotide phosphate).

**Table S1.** Overview of the studies on glutamine metabolism and its connection to ovarian cancer.

| Reference                    | Study Design         | Target                                                                                                                                                                                      | Study's Target                                                                                                                           | Result                                                                                                                                                                                                                                                                                                                                                                           |
|------------------------------|----------------------|---------------------------------------------------------------------------------------------------------------------------------------------------------------------------------------------|------------------------------------------------------------------------------------------------------------------------------------------|----------------------------------------------------------------------------------------------------------------------------------------------------------------------------------------------------------------------------------------------------------------------------------------------------------------------------------------------------------------------------------|
| (Guo et al., 2021)           | Case control study   | How OC obtains cisplatin (CDDP) resistance.                                                                                                                                                 | <ul style="list-style-type: none"> <li>• CDDP-sensitive ovarian cancer A2780 cells.</li> <li>• CDDP-resistant A2780cis cells.</li> </ul> | <ul style="list-style-type: none"> <li>• ↑ levels of glutamine, glutamate, and GSH in A2780cis cells.</li> <li>• Glutamine deficiency resulted in ↓ glutathione (GSH) concentrations &amp; CDDP resistance in A2780cis cells.</li> </ul>                                                                                                                                         |
| (Yang et al., 2014)          | Case control study   | Role of glutamine metabolism (via TCA) in cellular growth.                                                                                                                                  | <ul style="list-style-type: none"> <li>• High- and low-invasive</li> <li>• OVCA cells.</li> </ul>                                        | <ul style="list-style-type: none"> <li>• Link between cancer invasiveness and glutamine concentrations.</li> <li>• (High invasive-gln addicted)</li> <li>• Glutamine as a biomarker for patient prognosis.</li> </ul>                                                                                                                                                            |
| (Masamha & LaFontaine, 2018) |                      | Effects of combined treatment of the glutaminase inhibitor bis-2-(5-phenyl acetamido-1,3,4-thiadiazol-2-yl) ethyl sulfide (BPTES) with chemotherapy on drug resistant ovarian cancer cells. | Paclitaxel- and cisplatin-resistant cancer cells.                                                                                        | <ul style="list-style-type: none"> <li>• Monotherapy with BPTES alone resulted in a significant reduction in the ability of glutamine dependent cancer cells to form colonies in a clonogenic assay.</li> <li>• GLS1 isoforms (GAC or KGA) are important for glutamine dependent ovarian cancer survival and should be targeted in metastatic ovarian cancer therapy.</li> </ul> |
| (Tian et al., 2017)          | Comparative analysis | Glutamine and glutamate metabolisms in cancer.                                                                                                                                              | Gene expression data of: <ul style="list-style-type: none"> <li>• cancer tissues vs</li> <li>• normal control tissues</li> </ul>         | Glutamine generally not involved: <ul style="list-style-type: none"> <li>• in purine synthesis (except for breast cancer).</li> </ul>                                                                                                                                                                                                                                            |

|                          |                        |                                                                                                                                              |                                                                                                                                                                        |                                                                                                                                                                                                                                                                                                                                                                                                                                                                                                                                                                                                                                                                                                                                                                                                                                                                                                                                                                                                                           |
|--------------------------|------------------------|----------------------------------------------------------------------------------------------------------------------------------------------|------------------------------------------------------------------------------------------------------------------------------------------------------------------------|---------------------------------------------------------------------------------------------------------------------------------------------------------------------------------------------------------------------------------------------------------------------------------------------------------------------------------------------------------------------------------------------------------------------------------------------------------------------------------------------------------------------------------------------------------------------------------------------------------------------------------------------------------------------------------------------------------------------------------------------------------------------------------------------------------------------------------------------------------------------------------------------------------------------------------------------------------------------------------------------------------------------------|
|                          |                        |                                                                                                                                              | of 11 cancer types.                                                                                                                                                    | <ul style="list-style-type: none"> <li>• in pyridine synthesis (except kidney cancer).</li> <li>• in ATP production.</li> <li>• in asparagine synthesis (except for bladder and lung cancers).</li> <li>• in serine synthesis (except bladder cancer).</li> </ul> <p>Glutamine's contribution to nucleotide synthesis is minimal in any cancer.</p>                                                                                                                                                                                                                                                                                                                                                                                                                                                                                                                                                                                                                                                                       |
| (Yuan et al., 2015)      | Comprehensive analysis | Effects of glutamine on ovarian cancer cell growth (cell cycle progression, apoptosis, cytotoxicity, cellular stress).                       | <p>The three ovarian cancer cell lines:</p> <ul style="list-style-type: none"> <li>• HEY</li> <li>• SKOV3</li> <li>• and IGROV-1.</li> </ul>                           | <ul style="list-style-type: none"> <li>• Each line appears to increase in cell proliferation proportional to the amount of glutamine they receive.</li> <li>• Glutamine increased activity of glutaminase (GLS) and glutamate dehydrogenase (GDH).</li> <li>• Target glutamine metabolism as a therapeutic strategy for ovarian cancer therapy.</li> </ul>                                                                                                                                                                                                                                                                                                                                                                                                                                                                                                                                                                                                                                                                |
| (Cluntun et al., 2017)   | Review                 | Glutamine's metabolism in cancer therapy.                                                                                                    | Factors influence glutamine's participation in cancer therapy (type of tissue, underlying cancer genetics, micro-environment's tumor, maybe food and host physiology). | <p>Metabolic phenotypes of cancer cells have excessive heterogeneity from those that are highly dependent on catabolism of exogenous glutamine to those that accumulate glutamine via <i>de novo</i> synthesis and are self-sufficient for glutamine requirements.</p> <ul style="list-style-type: none"> <li>• Metabolic differences between CAFs and normal ovarian fibroblasts (NOFs) include more Gln anabolic pathways in CAFs compared to NOFs.</li> <li>• Dysregulated CAF metabolism induced adaptive mechanisms for harnessing carbon and nitrogen from atypical sources to synthesize Gln in environments where Gln is scarce.</li> <li>• Co-targeting highly expressed stromal glutamine synthetase GS with highly expressed cancer cell glutaminase (GLS) in an orthotopic intra-ovarian mouse model revealed that the metabolic interdependence of CAF and ovarian cancer (OVCA) cells confers a synthetic lethality in tumor and stromal compartments (↓ tumor weight, nodules, and metastasis).</li> </ul> |
| (Yang et al., 2016)      | Case control study     | Targeting stromal cells might be a potential therapeutic to control communication between the tumor microenvironment (TME) and cancer cells. | Using an orthotopic intra-ovarian mouse model for ovarian carcinoma.                                                                                                   |                                                                                                                                                                                                                                                                                                                                                                                                                                                                                                                                                                                                                                                                                                                                                                                                                                                                                                                                                                                                                           |
| (Kobayashi et al., 2022) | Review                 | Role of ROS production and antioxidant defense systems in the development of ovarian cancer cells, as possible therapeutic strategies.       | Redox homeostasis<br>Antioxidant defense systems (Redox cofactors, antioxidant transcription factors, detoxifying enzymes, and molecular scavengers).                  | <ul style="list-style-type: none"> <li>• ROS have a positive and negative impact on cancer evolution, leading to cancer progression (ROS levels below the threshold) or cell death (ROS levels beyond the threshold).</li> </ul>                                                                                                                                                                                                                                                                                                                                                                                                                                                                                                                                                                                                                                                                                                                                                                                          |

|                        |                    |                                                                                                                                                                                                                                                                                                                                                                                           |                                                                                                                                                                                                                                                                                                                                                                                                       |
|------------------------|--------------------|-------------------------------------------------------------------------------------------------------------------------------------------------------------------------------------------------------------------------------------------------------------------------------------------------------------------------------------------------------------------------------------------|-------------------------------------------------------------------------------------------------------------------------------------------------------------------------------------------------------------------------------------------------------------------------------------------------------------------------------------------------------------------------------------------------------|
|                        |                    |                                                                                                                                                                                                                                                                                                                                                                                           | <ul style="list-style-type: none"> <li>• Suppress tumors via:<br/>↑ ROS generation<br/>↑ the antioxidant defense system.</li> </ul>                                                                                                                                                                                                                                                                   |
| (Leippe et al., 2017)  |                    | <p>Metabolite detection assays developed to measure glucose, lactate, glutamate, and glutamine were characterized and evaluated for adaptability to HTS.</p> <p>Two ovarian cancer cell lines were involved: OVCAR-3 cells, low-invasive and glutamine-independent. SKOV-3 cells, high-invasive and require glutamine for growth.</p>                                                     | <ul style="list-style-type: none"> <li>• Difference in glutamine metabolism between OVCAR-3 and SKOV-3 cells (↑ in OVCAR-3 cells but ↓ in SKOV-3 ones).</li> <li>• OVCAR-3 cells secrete much less glutamate over time than SKOV-3 cells.</li> <li>• Differences in the production of lactate and glutamate by SKOV-3 cells were also identified.</li> </ul>                                          |
| (Hudson et al., 2016)  | Meta Analysis      | <p>Possible effect of glutamine metabolism on drug resistance to platinum-based chemotherapy for ovarian cancer.</p> <p>Evaluated two paired cell lines: the cisplatin-sensitive A2780 cell line and its cisplatin-resistant derivative, CP70, together with the cisplatin-sensitive OV 81.2 cell line.</p>                                                                               | <ul style="list-style-type: none"> <li>• C-Myc gene expression increases the glutamine dependency of platinum-resistant ovarian cancer cell lines on metabolism.</li> <li>• Glutaminase (GLS) overexpression confers platinum resistance and its inhibition via BPTES re-sensitizing platinum-resistant cells.</li> </ul>                                                                             |
| (Udumula et al., 2021) | Case control study | <p>Role of immunosuppressive CD11b<sup>+</sup>Gr1<sup>+</sup> myeloid cells in ovarian cancer growth, and how the ovarian cancer microenvironment can increase the immunosuppressive ability of these cells.</p> <p>Intraperitoneal ID8 syngeneic epithelial ovarian cancer mouse model.</p>                                                                                              | <ul style="list-style-type: none"> <li>• Metabolic fitness of myeloid cells can be increased by increasing glutamine metabolism.</li> <li>• Targeting glutamine metabolism via DLST in immunosuppressive myeloid cells decreases their activity, leading to a reduction in the immunosuppressive tumor microenvironment.</li> </ul>                                                                   |
| (Wang et al., 2020)    | Case control study | <p>Effect of glutamine on the immune function of ovarian cancer mice, treated with paclitaxel.</p> <p>Fifty (50) SPF female BALB/c mice, divided equally into five groups:</p> <ul style="list-style-type: none"> <li>• normal control group.</li> <li>• tumor control group.</li> <li>• paclitaxel group.</li> <li>• glutamine group.</li> <li>• combined intervention group.</li> </ul> | <ul style="list-style-type: none"> <li>• Paclitaxel does not improve the immunity of patients during the treatment of ovarian cancer.</li> <li>• Glutamine is an effective immunomodulator.</li> </ul>                                                                                                                                                                                                |
| (Chiu Li et al., 2002) | Review             | <p>Deal with toxic effects of the therapeutic substance on normal cells.</p> <p><u>Polyanhydride implant (Septacin) containing gentamicin sulfate.</u></p>                                                                                                                                                                                                                                | <ul style="list-style-type: none"> <li>• Achieved high drug concentration at the site of infection while maintaining low systemic drug levels.</li> </ul>                                                                                                                                                                                                                                             |
| (Hu et al., 2010)      | Review             | <p>p53's role in tumor suppression.</p> <p>Glutaminase 2 (GLS2) (Mitochondrial glutaminase catalyzing the hydrolysis of glutamine to glutamate).</p>                                                                                                                                                                                                                                      | <ul style="list-style-type: none"> <li>• p53 increases GLS2 expression.</li> <li>• GLS2 regulates:</li> <li>• Cellular energy metabolism as it induces the production of glutamate and α-ketoglutarate, which, in turn, results in enhanced mitochondrial respiration and ATP generation.</li> <li>• Antioxidant defense function in cells by increasing reduced glutathione (GSH) levels.</li> </ul> |

|                               |                    |                                                                                                                    |                                                                                                                                                                                            |                                                                                                                                                                                                                                                                                                                                                                                                                                                                                                 |
|-------------------------------|--------------------|--------------------------------------------------------------------------------------------------------------------|--------------------------------------------------------------------------------------------------------------------------------------------------------------------------------------------|-------------------------------------------------------------------------------------------------------------------------------------------------------------------------------------------------------------------------------------------------------------------------------------------------------------------------------------------------------------------------------------------------------------------------------------------------------------------------------------------------|
|                               |                    |                                                                                                                    |                                                                                                                                                                                            | <ul style="list-style-type: none"> <li>Decreasing ROS levels, which, in turn, protects cells from oxidative stress.</li> </ul>                                                                                                                                                                                                                                                                                                                                                                  |
| (Antico Arciuch et al., 2013) |                    | Molecular and metabolic alterations.                                                                               | Active repression of TCA cycle and OXPHOS in preneoplastic thyrocytes.                                                                                                                     | <ul style="list-style-type: none"> <li>PI3K activation induces, through the inactivation of AMPK, a coordinated repression of the expression of TCA cycle and respiratory genes, which favors aerobic glycolysis at the expense of OXPHOS.</li> </ul>                                                                                                                                                                                                                                           |
| (Kadige et al., 2009)         |                    | Why glucose and glutamine are required for cell growth; MondoA transcription factor.                               | <ul style="list-style-type: none"> <li>Glucose- and glutamine-starved cells.</li> <li>Glucose-only cells.</li> <li>Glutamine-only cells.</li> <li>Glucose plus glutamine cells.</li> </ul> | <ul style="list-style-type: none"> <li>Consistent with their combined requirement for cell division, neither glucose nor glutamine alone induced pathways important for cell growth or proliferation.</li> <li>There was no significant overlap in the biological pathways induced by glucose or glutamine alone, indicating that they also have independent roles.</li> <li>The combination of glucose and glutamine together induced multiple pathways required for cell division.</li> </ul> |
| (E Ó hAinmhire et al., 2014)  | Case control study | Expression of wild-type or mutant p53 or the absence of p53 alters ovarian cancer cell response to TGFβ signaling. | Six known ovarian cancer cell lines were analyzed: OVCA 420, OVCA 429, SCOV3, OVCAR 5, OVCA 432, and OVCAR 3.                                                                              | <ul style="list-style-type: none"> <li>Expression of p53 did not alter the ability of the ovarian cancer cells to respond to TGFβ.</li> <li>p53 status did affect proliferation, migration, and expression of pro-invasive genes.</li> </ul>                                                                                                                                                                                                                                                    |

**Table S2.** Clinical trials in ovarian cancer targeting glutamine metabolism.

| Study Phase | NCT Identifier | Condition Or Disease                                   | Therapy                                                          | Study Goal                                                                                               | Current Status |
|-------------|----------------|--------------------------------------------------------|------------------------------------------------------------------|----------------------------------------------------------------------------------------------------------|----------------|
| I           | NCT03944902    | Ovarian cancer-resistant BRCA wild-type ovarian cancer | Glutaminase inhibitor IPN60090 in combination with pembrolizumab | Occurrence of adverse effects                                                                            | Recruiting     |
| I           | NCT05039801    | A spectrum of solid tumors, including ovarian cancer   | CB-839                                                           | Evaluate agent toxicity as demonstrated by the incidence and frequency of treatment-related side effects | Terminated     |

**Table S3.** Abbreviations.

| Glutamine               | Gln | Oxidative phosphorylation     | OXPHOS     |
|-------------------------|-----|-------------------------------|------------|
| Glutathione             | GSH | Cancer-associated fibroblasts | CAFs       |
| Tumor microenvironment  | TME | High-throughput screening     | HTS        |
| Glutamate dehydrogenase | GDH | Tricarboxylic acid            | TCA circle |
